# Supplementary material for: Nickel(ii) dithiocarbamate complexes containing the pyrrole moiety for sensing anions and synthesis of nickel sulfide and nickel oxide nanoparticles
Source: Royal Society of Chemistry journal article supplement (doi:10.1039/c4nj02250e), 2015-01-01
Supplement: c4nj02250e1.pdf [file c4nj02250e1.pdf]

**Nickel(II) dithiocarbamate complexes containing pyrrole moiety for sensing of anions and  
synthesis of nickel sulfide and nickel oxide nanoparticles**

*Ethiraj Sathiyaraj, Govindasamy Gurumoorthy and SubbiahThirumaran\**

**New Journal of Chemistry**

**Table:S1 Correlations in the HSQC spectrum of complex**

| <sup>13</sup> C Chemical shifts (δ, ppm) | Correlation in the HSQC spectrum |
|------------------------------------------|----------------------------------|
| 43.6 ( CH <sub>2</sub> - pyrrole)        | 4.67 (furyl)                     |
| 44.7 ( CH <sub>2</sub> -furyl)           | 4.71(pyrrole)                    |
| 123.9 (C-2) pyrrole                      | -                                |
| 110.3(C-3) pyrrole                       | 6.21                             |
| 108.1(C-4) pyrrole                       | 6.13                             |
| 119.8 (C-5) pyrrole                      | 6.83                             |
| 147.4(C-2) furyl                         | -                                |
| 143.1(C-5) furyl                         | 7.43                             |
| 110.8 (C-3), 110.9 (C-4) furyl           | 6.38                             |

**Table: S2 Correlations in the HMBC spectrum of complex 2**

| <sup>13</sup> C Chemical shifts (δ, ppm) | Correlation in the HMBC spectrum       |
|------------------------------------------|----------------------------------------|
| 43.6 ( CH <sub>2</sub> -pyrrole)         | 4.71 (H-1)                             |
| 44.7 ( CH <sub>2</sub> -furyl)           | 4.67 ( H-1)                            |
| 123.9 (C-2) pyrrole                      | 6.83(H-5), 6.21(H-4), 4.71(furyl)      |
| 119.8 (C-5) pyrrole                      | -                                      |
| 110.3(C-3) pyrrole                       | -                                      |
| 108.1(C-4) pyrrole                       | -                                      |
| 147.4(C-2) furyl                         | 7.43 (H-5), 6.38 (H-4), 4.66 (pyrrole) |
| 143.1(C-5) furyl                         | -                                      |
| 110.8, 110.9 (C-3) (C-4) furyl           | -                                      |

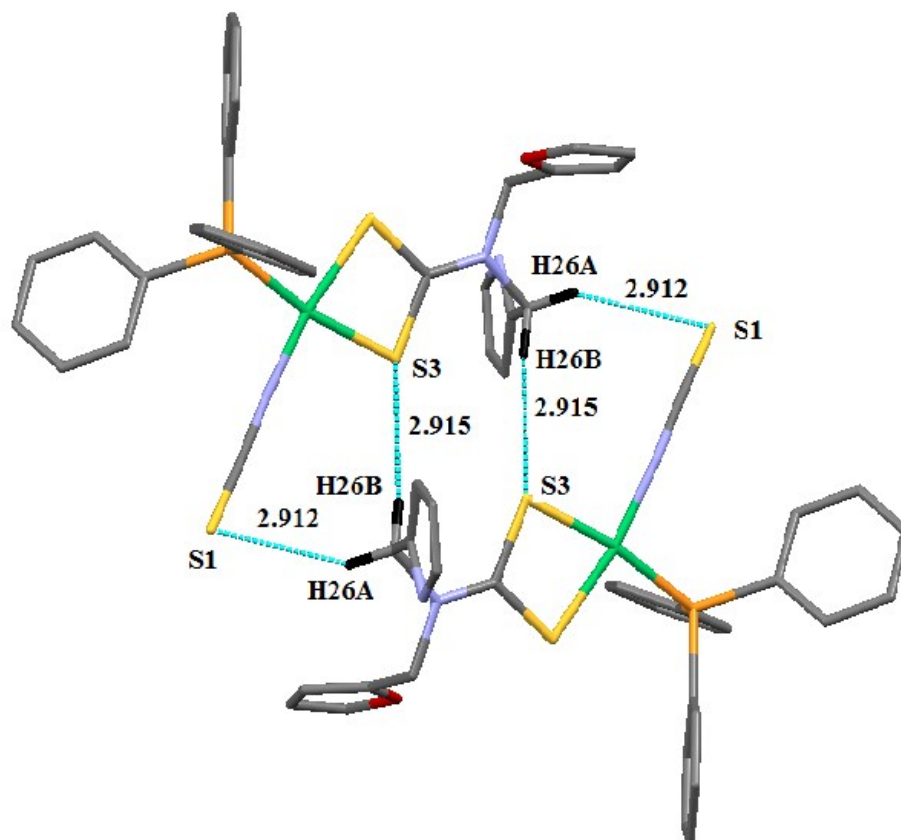

**Fig. S1** Intermolecular S...H-C interactions (2.91 and 2.92 Å) in complex **5**.

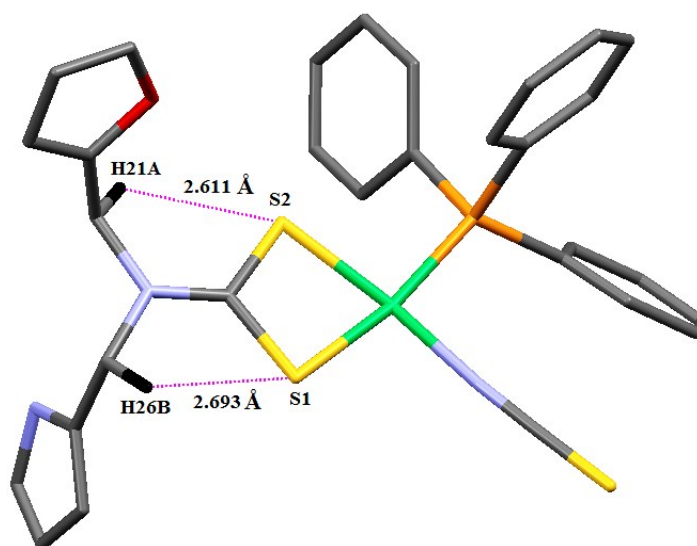

**Fig. S2** Intramolecular S...H-C interactions (2.61 and 2.69 Å) in complex **5**.

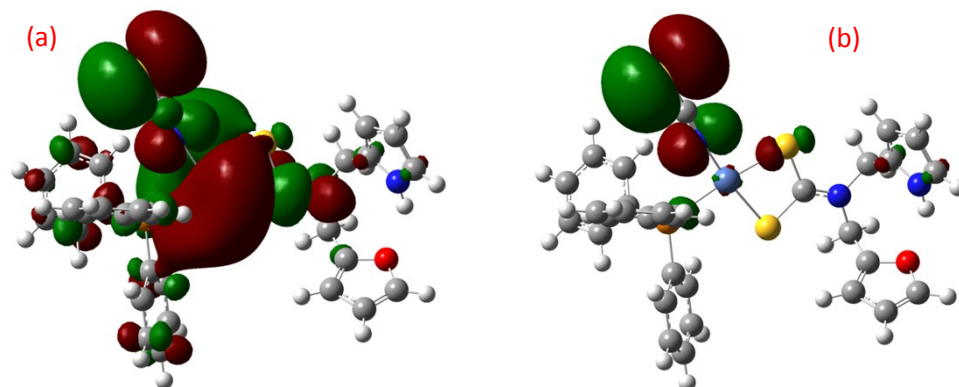

**Fig. S3 HOMO and LUMO plots of complex 5**

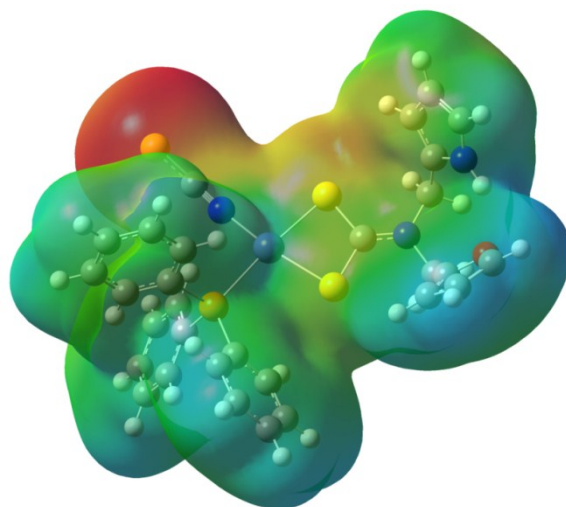

**Fig. S4 MEP plot of complex 5**

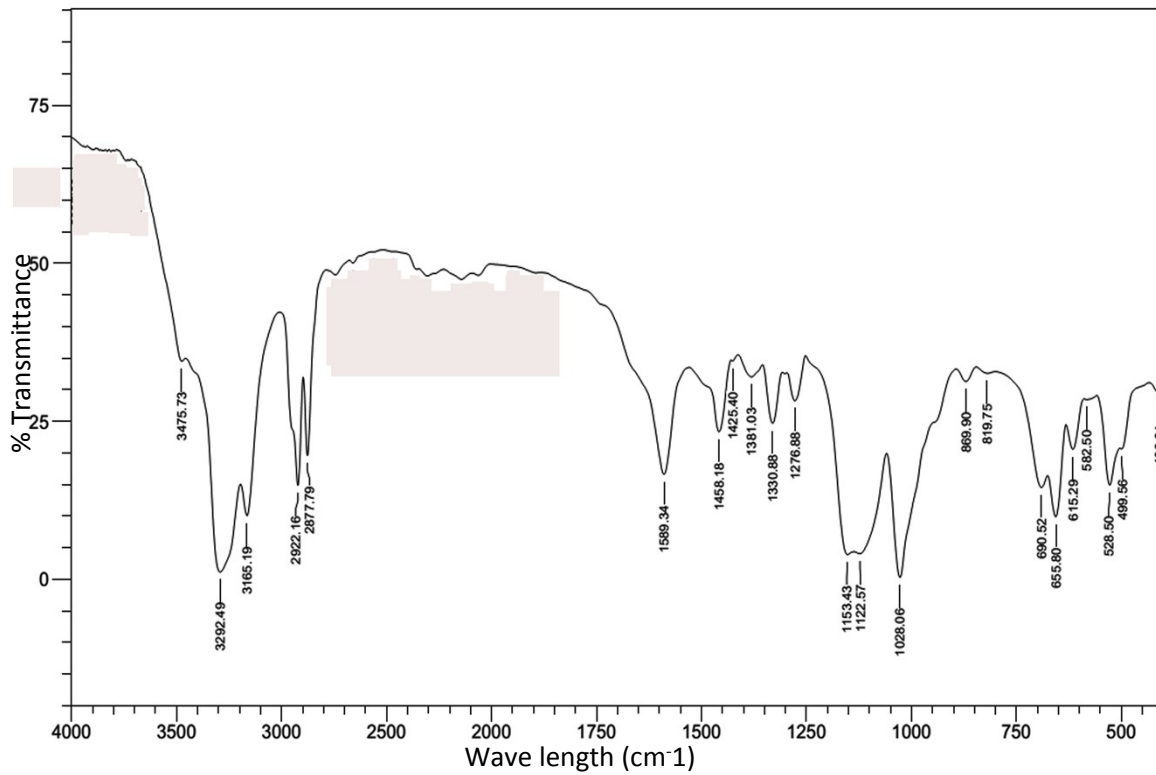

**Fig. S5** FT-IR spectrum of the as-synthesized Nickel sulfide NPs
